# Supplementary material for: Low antibodies against Plasmodium falciparum and imbalanced pro-inflammatory cytokines are associated with severe malaria in Mozambican children: a case–control study
Source: Malar J. 2012 May 30;11:181. doi: 10.1186/1475-2875-11-181 (PMC3464173; doi:10.1186/1475-2875-11-181)
Supplement: Additional file 1 — Spearman’s rank correlation coefficients between IgG and IgM levels in the study population. * P < 0.05. [file 1475-2875-11-181-S1.pdf]

**Additional file 1.** Spearman's rank correlation coefficients between IgG and IgM levels in the study population. \*  $P < 0.05$ .

[illegible]
